# Supplementary material for: NMDA receptors in visual cortex are necessary for normal visuomotor integration and skill learning
Source: eLife journal article supplement (doi:10.7554/elife.71476), 2022-02-16

**A**

AAV2/1-Ef1 $\alpha$ -NES-jRGECO1a  
 AAV2/1-Ef1 $\alpha$ -DIO-mEGFP-P2A-paAIP2 AAV2/1-Ef1 $\alpha$ -NES-jRGECO1a

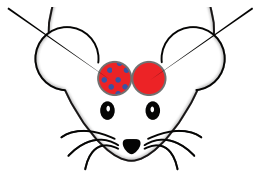

*Pvalb<sup>tm1(cre)Arbr/J</sup>*

**B**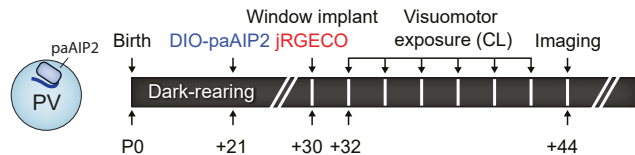**C**

Mismatch onset response

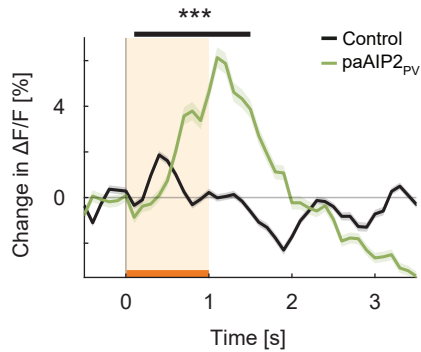**D**

Grating onset response

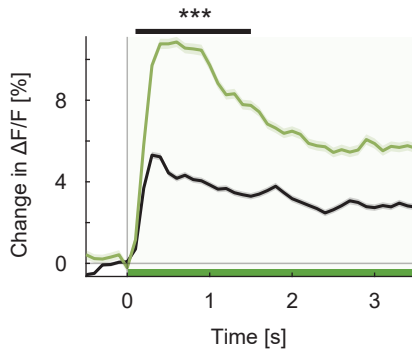**E**

Running onset response

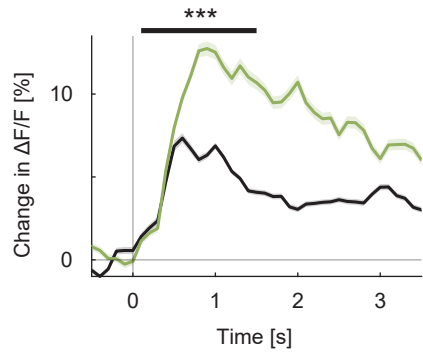

Supplement: supp [file elife-71476-supp-v1.zip]
