# Supplementary figures and images for: NMDA receptors in visual cortex are necessary for normal visuomotor integration and skill learning
Source: eLife journal article supplement (doi:10.7554/elife.71476), 2022-02-16

**A** Mismatch onset response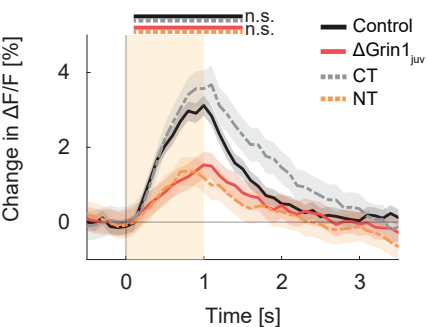**B** Attinger et al, 2017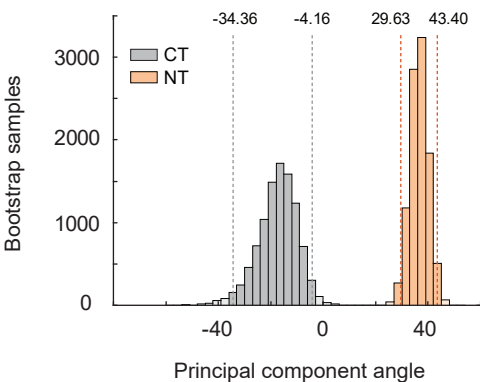 $\Delta Grin1_{juv}$ 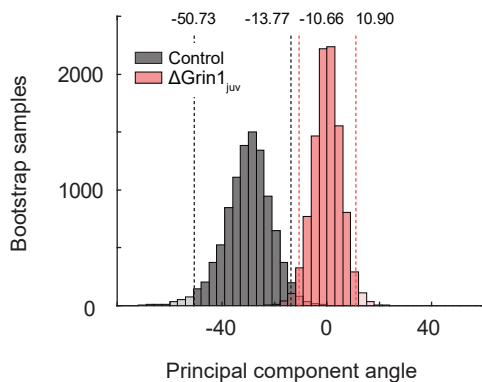**C** MK-801<sub>adult</sub>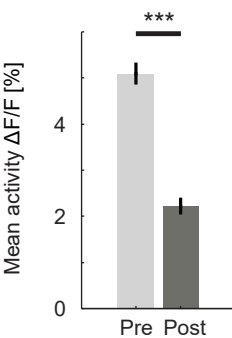**D** MK-801<sub>adult</sub>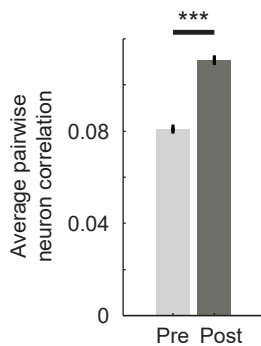

Supplement: supp [file elife-71476-supp-v1.zip]

**A**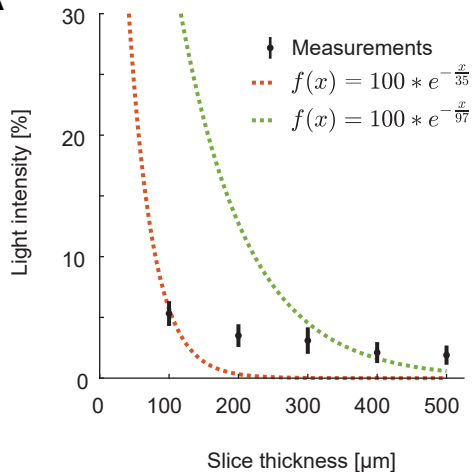**B**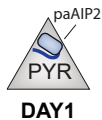

Average pairwise  
neuron correlation

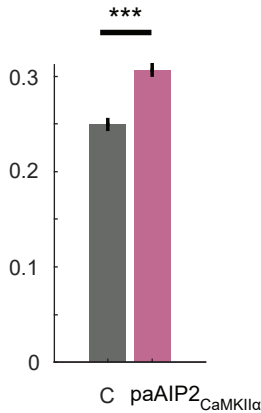

Supplement: supp [file elife-71476-supp-v1.zip]

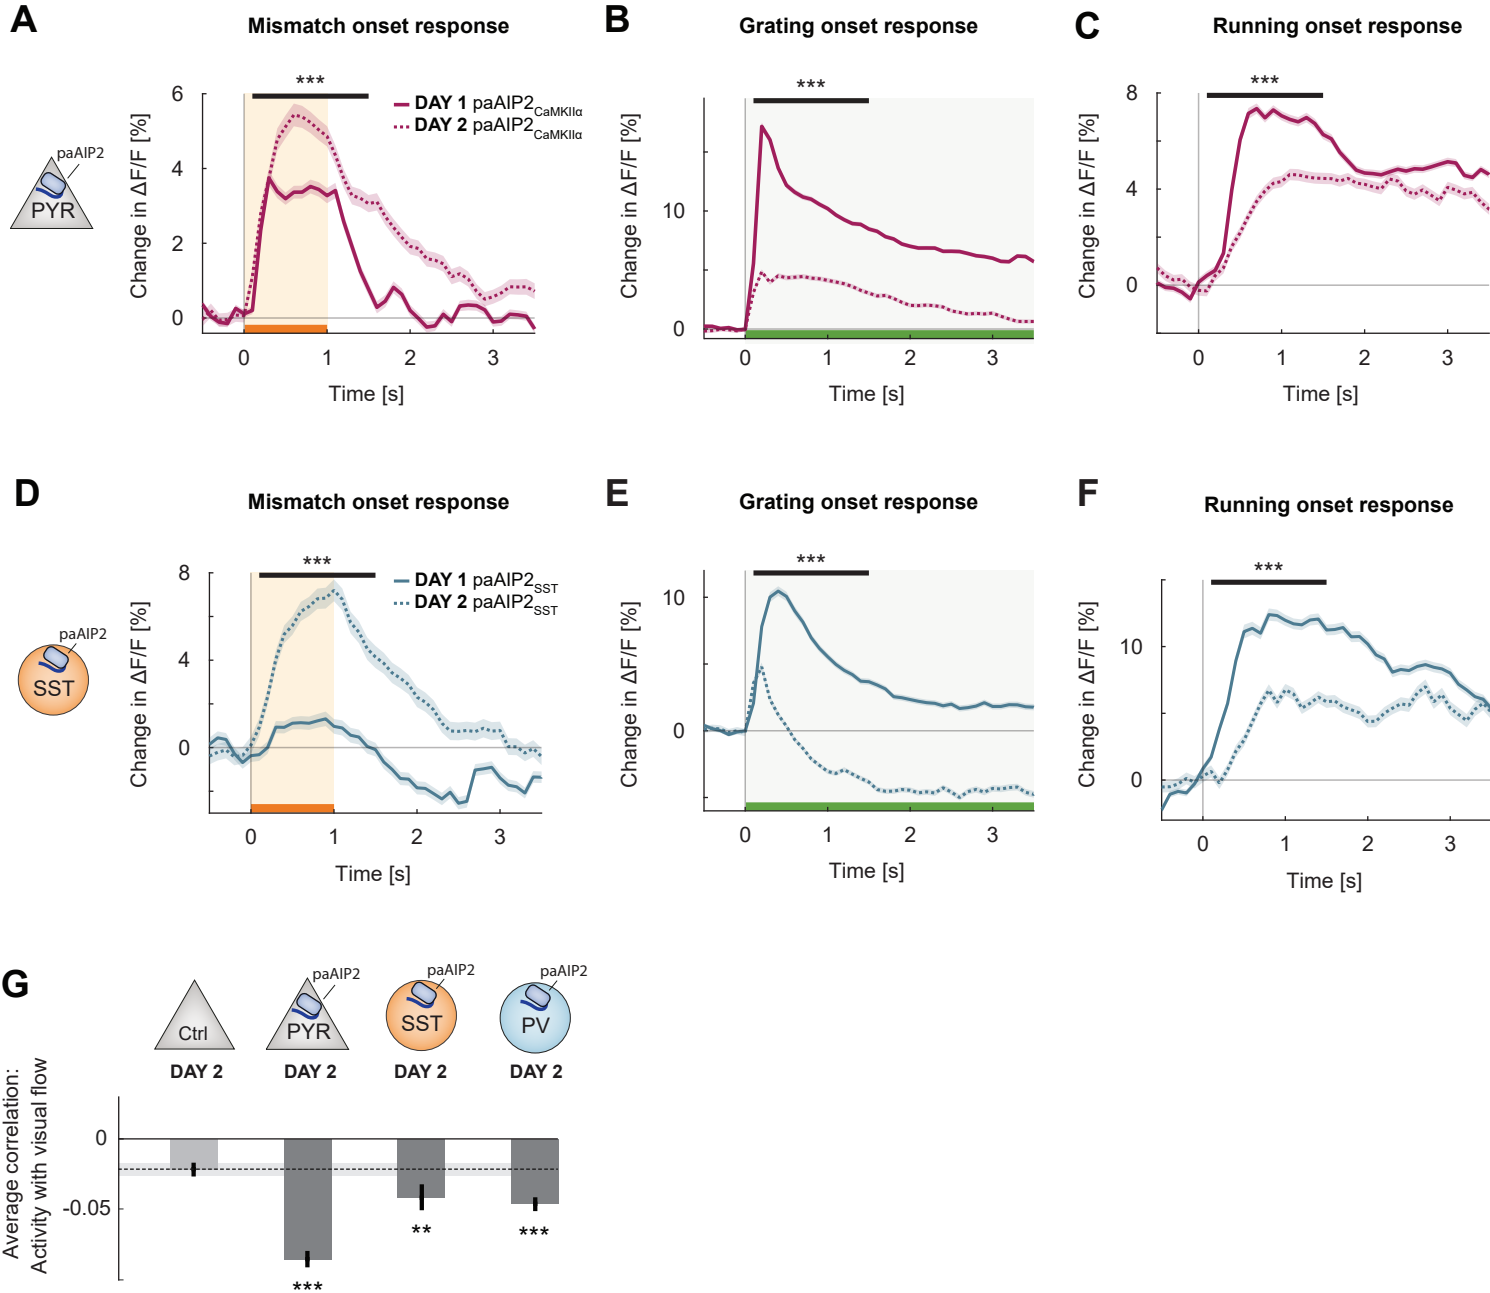

Supplement: supp [file elife-71476-supp-v1.zip]

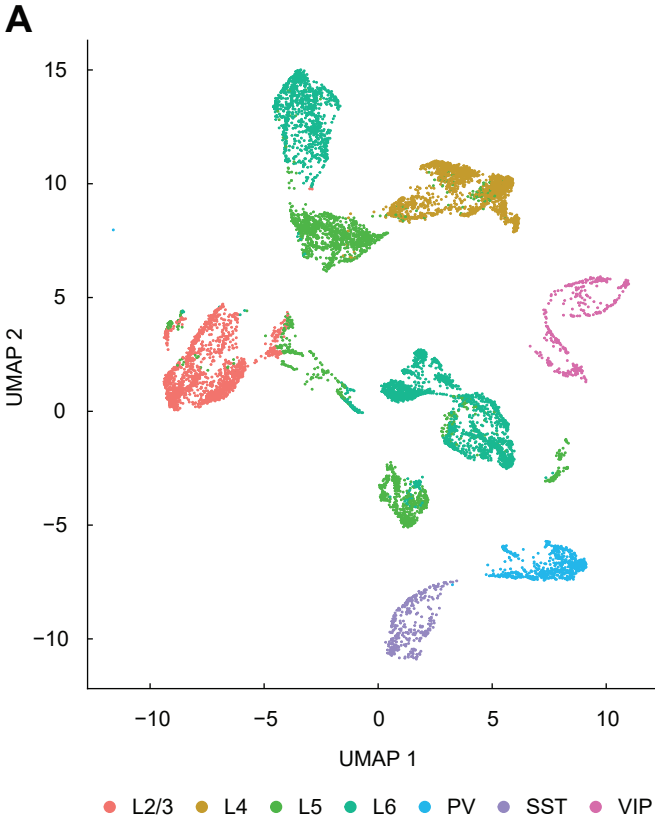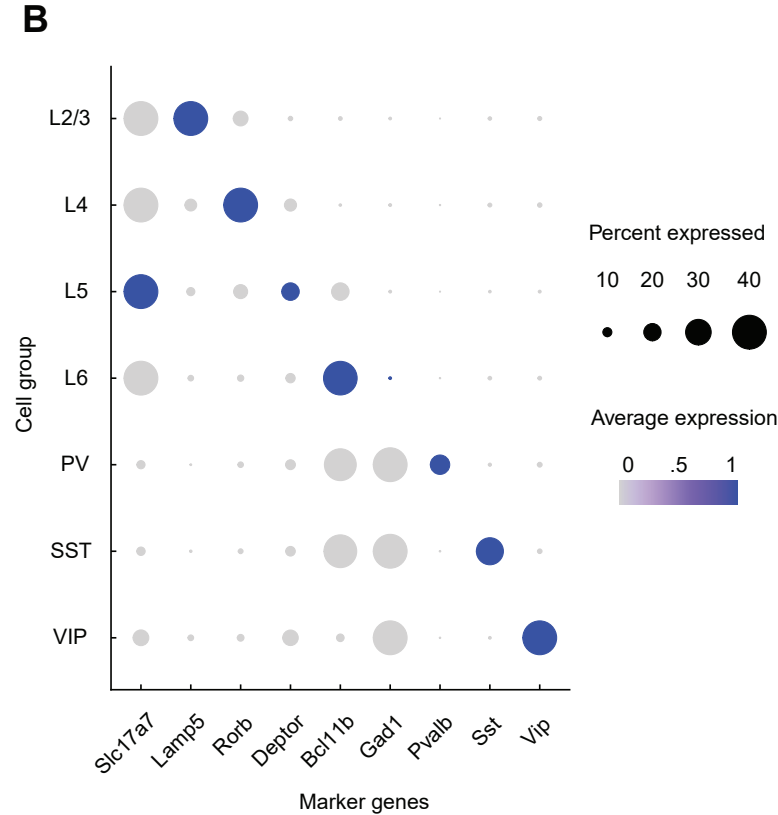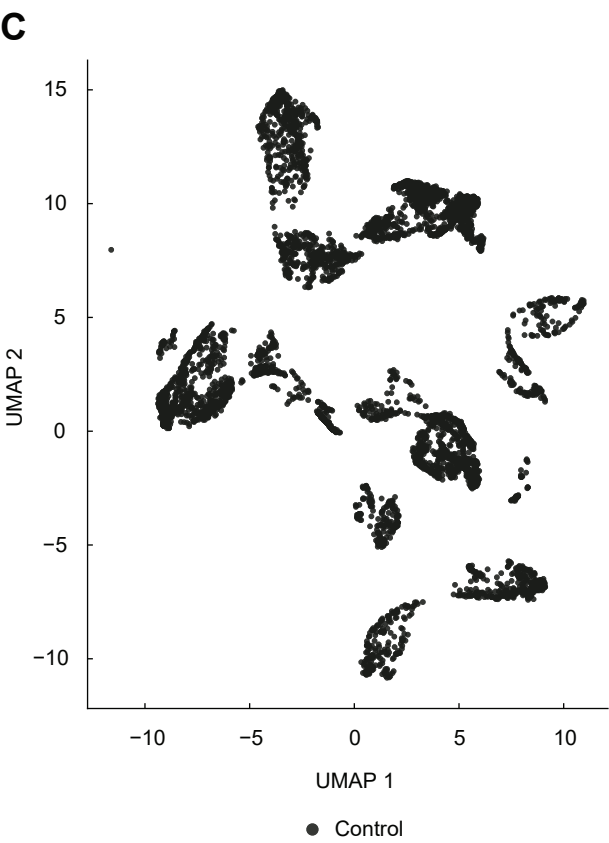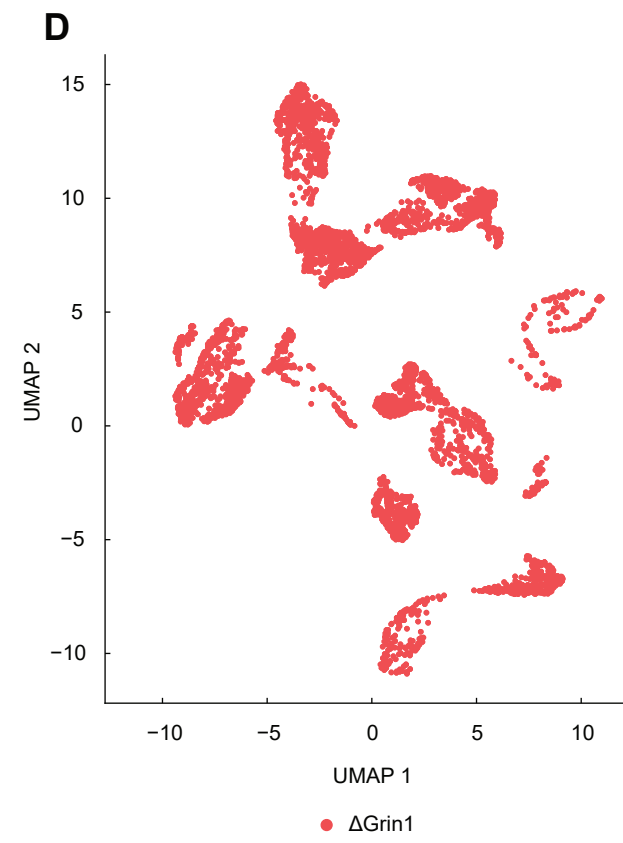

Supplement: supp [file elife-71476-supp-v1.zip]
